# Supplementary material for: Synthesis of 3D flower-like hierarchical NiCo-LDH microspheres with boosted electrochemical performance for hybrid supercapacitors
Source: Royal Society of Chemistry journal article supplement (doi:10.1039/d1qi00613d), 2021-01-01
Supplement: d1qi00613d1.pdf [file d1qi00613d1.pdf]

## Electronic Supplementary Material

### Synthesis of 3D flower-like hierarchical NiCo-LDH microspheres with boosted electrochemical performance for hybrid supercapacitors

Di Jiang<sup>a</sup>, Chuan-Ying Wei<sup>a</sup>, Zi-Yang Zhu<sup>a</sup>, Xiao-Hui Guan<sup>a</sup>, Min Lu<sup>a,\*</sup>, Xiao-Juan Zhang<sup>b,\*</sup> and Guang-Sheng Wang<sup>c,\*</sup>

<sup>a</sup>School of Chemical Engineering, Northeast Electric Power University, Jilin 132000, PR China.

<sup>b</sup>College of Chemistry and Materials Engineering, Beijing Technology and Business University, Beijing 100048, PR China.

<sup>c</sup>School of Chemistry, Beihang University, Beijing 100191, PR China.

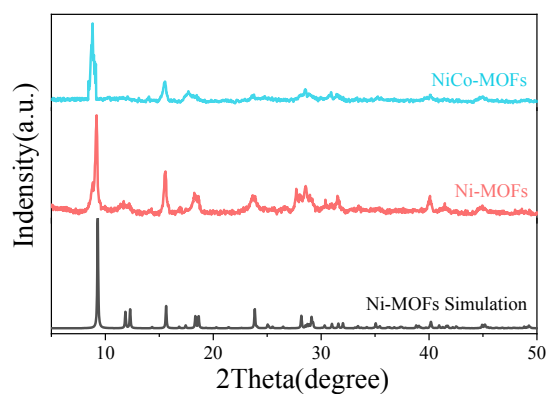

Fig. S1. The XRD patterns of Ni-MOFs and NiCo-MOFs precursor.

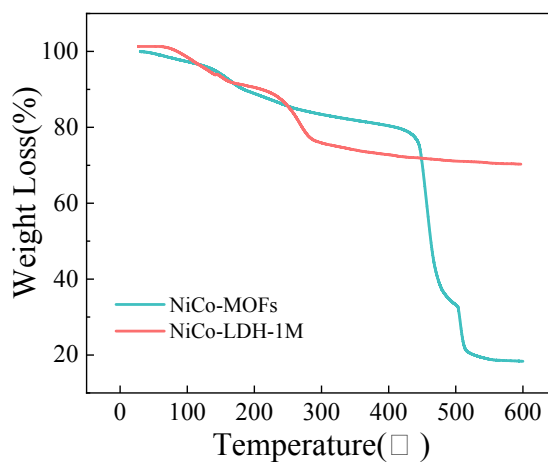

Fig. S2. The TG curves of NiCo-MOFs and NiCo-LDH-1M.

**Fig. S3.** N<sub>2</sub> adsorption/desorption isotherms and pore size distribution of (a) NiCo-LDH-0.5M and (b) NiCo-LDH-1.5M.

**Fig. S4.** (a) GCD curves for NiCu-MOFs, NiCu-LDH-1M tested at a current density of 0.5 A·g<sup>-1</sup>; (b) GCD curves of NiMn-MOFs precursor, NiMn-LDH-1M at a current density of 0.5 A·g<sup>-1</sup>.

**Fig. S5.** CV curves of (a) NiCo-MOFs precursor; (c) NiCo-LDH-0.5M and (e) NiCo-LDH-1.5M at scan rates of 5-50 mV·s<sup>-1</sup>; GCD curves of (b) NiCo-MOFs precursor, (d) NiCo-LDH-0.5M and (f) NiCo-LDH-1.5M at different current densities.

**Fig. S6.** GCD curves of (a) NiCo-LDH-0.75M and (b) NiCo-LDH-1.25M at different current densities.

**Fig. S7.** (a) CV and (b) GCD curves of AC measured in the 2M KOH; (c) CV curves of the NiCo-LDH-1M//AC HSC tested at a scan rate of 50 mV s<sup>-1</sup> with different voltage windows; (d) rate performance of the NiCo-LDH-1M//AC HSC.

Table S1. Comparison of electrochemical performance between the NiCo-LDH-1M composites and previous reports.

| Materials                                                       | Current density       | Specific capacitance     | Cycling performance  | Energy density(Wh·kg <sup>-1</sup> ) | Power density(W·kg <sup>-1</sup> ) | Ref.      |
|-----------------------------------------------------------------|-----------------------|--------------------------|----------------------|--------------------------------------|------------------------------------|-----------|
| NiMn-LDH                                                        | 1 A·g <sup>-1</sup>   | 1183 C·g <sup>-1</sup>   | 95.7%, 2000 cycles   | 16.9                                 | 1350                               | 27        |
| MOF-derived Co(OH) <sub>2</sub>                                 | 0.1 A·g <sup>-1</sup> | 604.5 F·g <sup>-1</sup>  | 84.5%, 200 cycles    | 13.6                                 | 140                                | 39        |
| MOF-derived Ni <sub>x</sub> Co <sub>1-x</sub> (OH) <sub>2</sub> | 0.5 A·g <sup>-1</sup> | 1235.9 F·g <sup>-1</sup> | 73%, 10000 cycles    | 21.9                                 | 348.9                              | 57        |
| MCF-35-Ni(OH) <sub>2</sub> -3h                                  | 0.5 A·g <sup>-1</sup> | 2255 F·g <sup>-1</sup>   | -                    | 42.54                                | 370.8                              | 58        |
| nano-Ni(OH) <sub>2</sub> /graphite                              | 4.8 A·g <sup>-1</sup> | 1190 F·g <sup>-1</sup>   | 90%, 500 cycles      | 19                                   | 3000                               | 59        |
| Ni-Mn LDH/MnO <sub>2</sub>                                      | 10 A·g <sup>-1</sup>  | 680 F·g <sup>-1</sup>    | 85%, 10000 cycles    | 15                                   | 1500                               | 60        |
| Y-doped-Ni(OH) <sub>2</sub>                                     | 1 A·g <sup>-1</sup>   | 1860 F·g <sup>-1</sup>   | 78%, 5000 cycles     | 22                                   | 754.6                              | 61        |
| Ni/Ni(OH) <sub>2</sub>                                          | 2 mA·cm <sup>-1</sup> | 62 F·g <sup>-1</sup>     | 90%, 6000 cycles     | 23.5                                 | 530                                | 62        |
| C/N-Ni(OH) <sub>2</sub> /Ni <sub>x</sub> S <sub>y</sub>         | 0.5 A·g <sup>-1</sup> | 1731.2 F·g <sup>-1</sup> | 140.9%, 10000 cycles | 38.9                                 | 404.4                              | 63        |
| NiCo-LDH-1M                                                     | 1 A·g <sup>-1</sup>   | 1750 F·g <sup>-1</sup>   | 91%, 3000 cycles     | 48.6                                 | 850                                | This work |
